# Supplementary material for: Formulation, General Features and Global Calibration of a Bioenergetically-Constrained Fishery Model
Source: PubMed Central journal article supplement (PMC5245811; doi:10.1371/journal.pone.0169763), 2017-01-19
Supplement: pone.0169763.s001.pdf [file pone.0169763.s001.pdf]

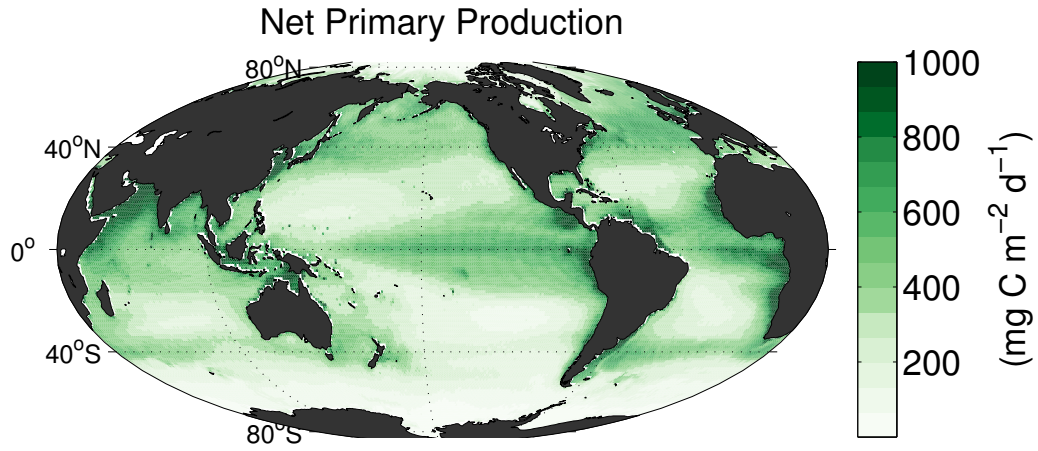

S1 Fig. Annual average net primary production (mg C m<sup>-2</sup> d<sup>-1</sup>) forcing applied in BOATS.
