# Supplementary material for: Formulation, General Features and Global Calibration of a Bioenergetically-Constrained Fishery Model
Source: PubMed Central journal article supplement (PMC5245811; doi:10.1371/journal.pone.0169763), 2017-01-19
Supplement: pone.0169763.s008.pdf [file pone.0169763.s008.pdf]

**S3 Table. Large Marine Ecosystem numbers and names.** LMEs with a \* before the number are ignored in the analysis since they are high latitude sites (and so NPP is not reliable) or inland seas.

| <b>LME</b> | <b>Name</b>                      | <b>LME</b> | <b>Name</b>                              |
|------------|----------------------------------|------------|------------------------------------------|
| 1          | Baltic Sea                       | 34         | Indonesian Sea                           |
| 2          | Sea of Okhotsk                   | 35         | East Brazil Shelf                        |
| 3          | North Sea                        | 36         | Humboldt Current                         |
| 4          | Gulf of Alaska                   | 37         | Benguela Current                         |
| 5          | Labrador - Newfoundland          | 38         | North Australian Shelf                   |
| 6          | Celtic-Biscay Shelf              | 39         | Northeast Australian Shelf               |
| 7          | Sea of Japan                     | 40         | Agulhas Current                          |
| 8          | Oyashio Current                  | 41         | Northwest Australian Shelf               |
| 9          | Scotian Shelf                    | 42         | East Central Australian Shelf            |
| 10         | California Current               | 43         | South Brazil Shelf                       |
| *11        | Black Sea                        | 44         | New Zealand Shelf                        |
| 12         | Northeast U.S. Continental Shelf | 45         | Patagonian Shelf                         |
| 13         | Mediterranean Sea                | 46         | Southeast Australian Shelf               |
| 14         | Iberian Coastal                  | *47        | Antarctica                               |
| 15         | Kuroshio Current                 | 48         | South West Australian Shelf              |
| 16         | Yellow Sea                       | 49         | West Central Australian Shelf            |
| 17         | Canary Current                   | 50         | Faroe Plateau                            |
| 18         | East China Sea                   | 51         | Iceland Shelf and Sea                    |
| 19         | Southeast U.S. Continental Shelf | 52         | Greenland Sea                            |
| 20         | Gulf of California               | 53         | Norwegian Sea                            |
| 21         | Gulf of Mexico                   | 54         | Barents Sea                              |
| 22         | Arabian Sea                      | *55        | Kara Sea                                 |
| 23         | Red Sea                          | *56        | Laptev Sea                               |
| 24         | Insular Pacific-Hawaiian         | *57        | East Siberian Sea                        |
| 25         | Caribbean Sea                    | 58         | West Bering Sea                          |
| 26         | South China Sea                  | 59         | Aleutian Islands                         |
| 27         | Bay of Bengal                    | 60         | East Bering Sea                          |
| 28         | Pacific Central-American Coastal | *61        | Canadian Eastern Arctic - West Greenland |
| 29         | Sulu-Celebes Sea                 | *62        | Hudson Bay Complex                       |
| 30         | Gulf of Thailand                 | *63        | Beaufort Sea                             |
| 31         | North Brazil Shelf               | *64        | Canadian High Arctic - North Greenland   |
| 32         | Guinea Current                   | *65        | Central Arctic                           |
| 33         | Somali Coastal Current           | *66        | Northern Bering - Chukchi Seas           |
