# Supplementary material for: Formulation, General Features and Global Calibration of a Bioenergetically-Constrained Fishery Model
Source: PubMed Central journal article supplement (PMC5245811; doi:10.1371/journal.pone.0169763), 2017-01-19
Supplement: pone.0169763.s009.pdf [file pone.0169763.s009.pdf]

**S4 Table. Partitioning of SAUP functional groups into small (S), medium (M), large (L), and other (O) size groups.**

| <b>Functional Group</b>      | <b>Size Group</b> |
|------------------------------|-------------------|
| Large benthopelagics         | L                 |
| Medium demersals             | M                 |
| Small pelagics               | S                 |
| Small to medium flatfishes   | O                 |
| Medium pelagics              | M                 |
| Large demersals              | L                 |
| Other demersal invertebrates | O                 |
| Lobsters and crabs           | S                 |
| Shrimps                      | S                 |
| Cephalopods                  | O                 |
| Small to medium rays         | O                 |
| Small demersals              | S                 |
| Large flatfishes             | L                 |
| Medium benthopelagics        | M                 |
| Other groups                 | O                 |
| Small bathydemersals         | S                 |
| Large bathydemersals         | L                 |
| Large pelagics               | L                 |
| Large sharks                 | L                 |
| Medium reef association fish | M                 |
| Large reef association fish  | L                 |
| Small reef association fish  | S                 |
| Large rays                   | L                 |
| Medium bathydemersals        | M                 |
| Medium bathypelagics         | M                 |
| Small bathypelagics          | S                 |
| Small to medium sharks       | O                 |
| Krill                        | S                 |
