# Supplementary material for: Formulation, General Features and Global Calibration of a Bioenergetically-Constrained Fishery Model
Source: PLOS journal article supplement (doi:10.1371/journal.pone.0169763), 2017-01-19
Supplement: S2 (10.1371/journal.pone.0169763.s002) [file journal.pone.0169763.s002]

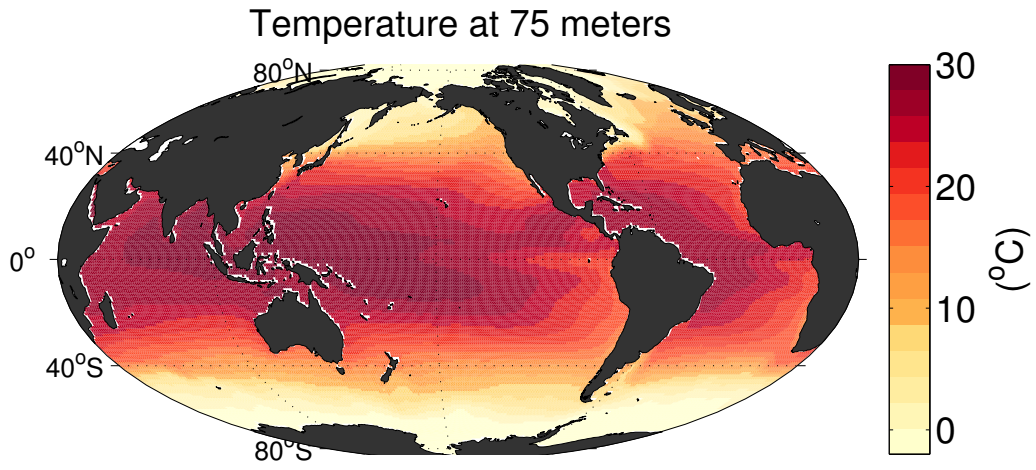

S2 Fig. Annual average 75-meter average temperature (°C) forcing applied in BOATS.
