# Supplementary material for: Formulation, General Features and Global Calibration of a Bioenergetically-Constrained Fishery Model
Source: PLOS journal article supplement (doi:10.1371/journal.pone.0169763), 2017-01-19
Supplement: S3 (10.1371/journal.pone.0169763.s003) [file journal.pone.0169763.s003]

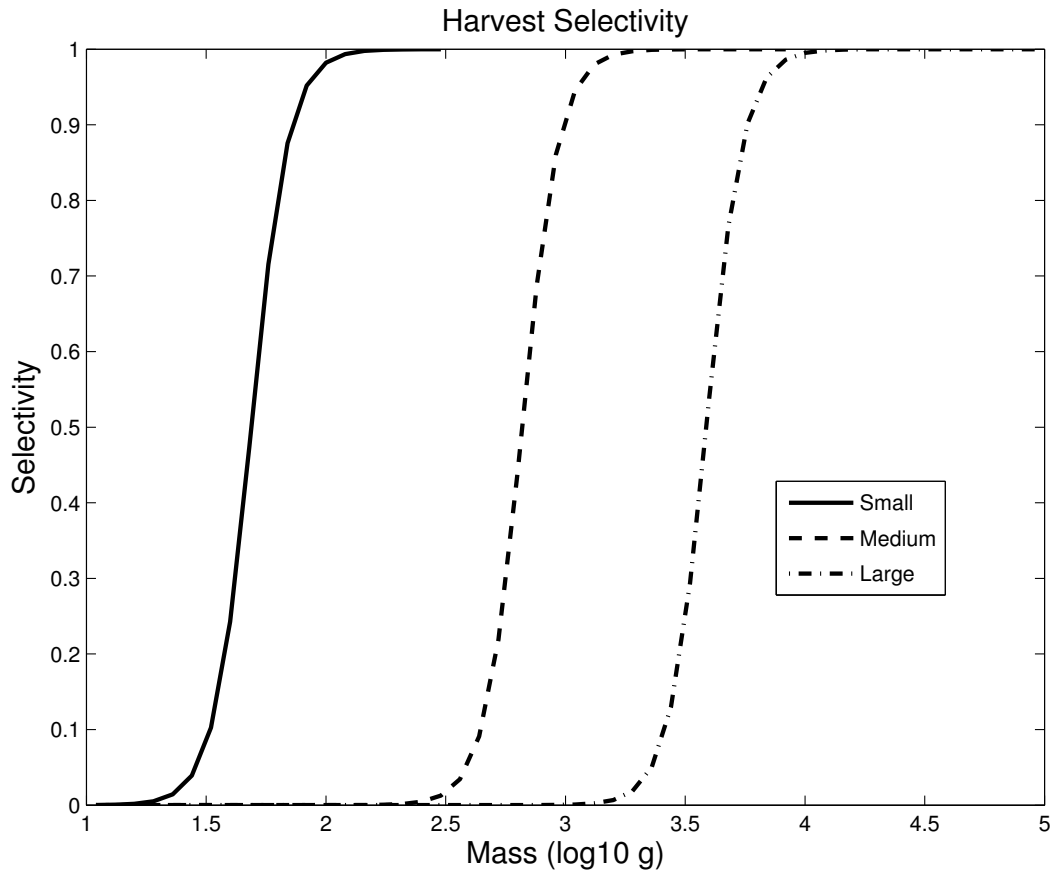

**S3 Fig. Harvest selectivity  $\sigma_k$  by group.** Solid, dashed, and dot-dashed curves are small, medium, and large group harvest.
