# Supplementary material for: Formulation, General Features and Global Calibration of a Bioenergetically-Constrained Fishery Model
Source: PLOS journal article supplement (doi:10.1371/journal.pone.0169763), 2017-01-19
Supplement: S5 (10.1371/journal.pone.0169763.s005) [file journal.pone.0169763.s005]

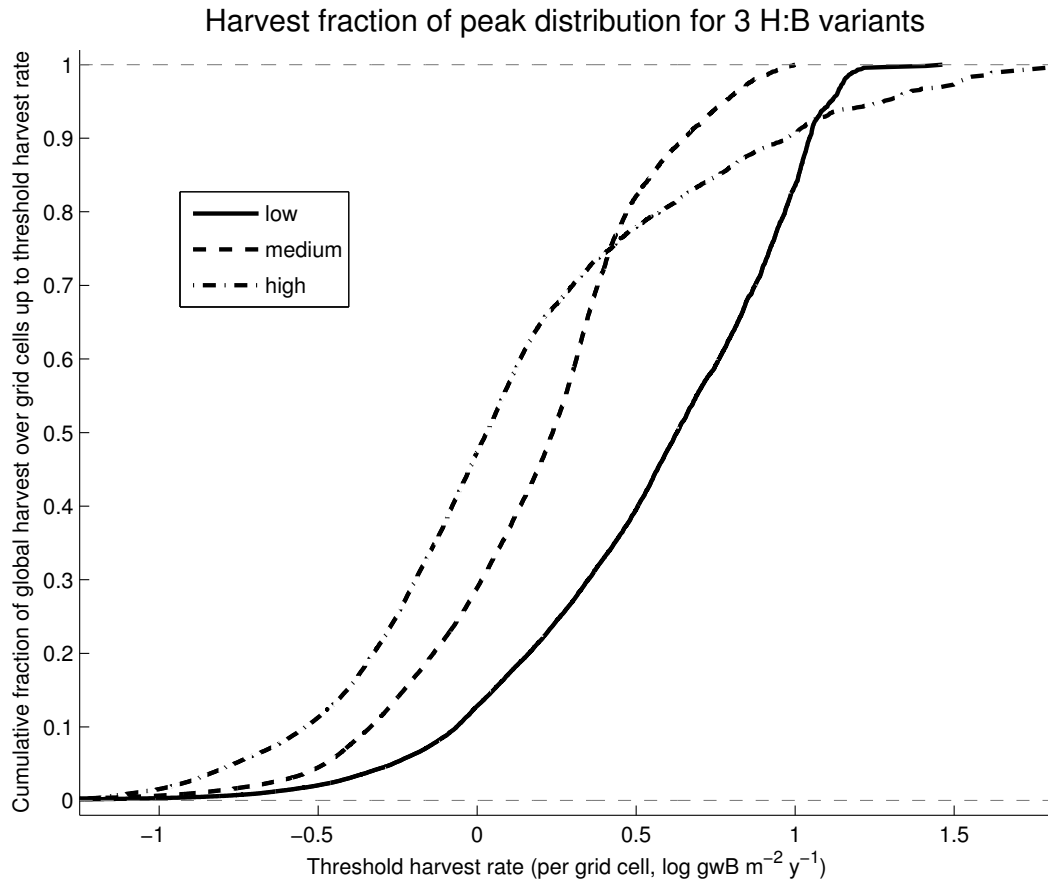

**S5 Fig. Cumulative fraction of global harvest integrated over all grid cells with a harvest rate less than a threshold harvest rate for low, medium, and high harvest to biomass ratio (H:B) model variants. Solid, dashed, and dot-dashed curves represent low, medium, and high H:B model variants. Curves are from the annual average of the year of peak harvest, and correspond to Fig 10A-C.**
